# Supplementary material
Source: MDPI journal article supplement (https://www.mdpi.com/2379-139X/7/4/77)
Supplement: s1 [file s1]

**Table S1.** The parameters of the spatial-attention block.

| Layers | Parameters                                        | Output Size                        |
|--------|---------------------------------------------------|------------------------------------|
| V1     | conv (k1s1p0) <sup>1</sup> +BN <sup>2</sup> +ReLU | $512 \times 512 \times 16$         |
|        | conv (k3s1p1)+BN+ReLU                             | $512 \times 512 \times 16$         |
| DS     | $2 \times 2$ MaxPooling                           | $256 \times 256 \times 16$         |
| V2     | conv (k1s1p0)+BN+ReLU                             | $256 \times 256 \times 32$         |
|        | conv (k3s1p1)+BN+ReLU                             | $256 \times 256 \times 32$         |
| DS     | $2 \times 2$ MaxPooling                           | $128 \times 128 \times 32$         |
| V3     | conv (k1s1p0)+BN+ReLU                             | $128 \times 128 \times 64$         |
|        | conv (k3s1p1)+BN+ReLU                             | $128 \times 128 \times 64$         |
| DS     | $2 \times 2$ MaxPooling                           | $64 \times 64 \times 64$           |
| V4     | conv (k1s1p0)+BN+ReLU                             | $64 \times 64 \times 128$          |
|        | conv (k3s1p1)+BN+ReLU                             | $64 \times 64 \times 128$          |
| US     | UnSampling+concatenation                          | $128 \times 128 \times (64 + 128)$ |
| V5     | conv (k1s1p0)+BN+ReLU                             | $128 \times 128 \times 64$         |
|        | conv (k3s1p1)+BN+ReLU                             | $128 \times 128 \times 64$         |
| US     | UnSampling+concatenation                          | $256 \times 256 \times (32 + 64)$  |
| V6     | conv (k1s1p0)+BN+ReLU                             | $256 \times 256 \times 32$         |
|        | conv (k3s1p1)+BN+ReLU                             | $256 \times 256 \times 32$         |
| US     | UnSampling+concatenation                          | $512 \times 512 \times (16 + 32)$  |
| V7     | conv (k1s1p0)+BN+ReLU                             | $512 \times 512 \times 16$         |
|        | conv (k3s1p1)+BN+ReLU                             | $512 \times 512 \times 16$         |
| conv   | k1s1p0                                            | $512 \times 512 \times 1$          |

<sup>1</sup> conv(k1s1p0) represents the convolutional layer with kernel size 1, stride 1 and 0 paddings.<sup>2</sup> batch normalization
